# Supplementary material for: Adult Smokers’ Awareness and Interest in Trying Heated Tobacco Products: Perspectives from Mexico, where HTPs and E-Cigarettes are Banned
Source: PubMed Central journal article supplement (PMC7177513; doi:10.3390/ijerph17072173), 2020-03-25
Supplement: ijerph-17-02173-s001.pdf [file ijerph-17-02173-s001.pdf]

Supplementary Material

**Table S1.** Factors associated with the interest in trying IQOS, among adult smokers who were aware of HTPs (n = 550).

| Variable                        | Univariate estimates |                   |             | Adjusted estimates |              |
|---------------------------------|----------------------|-------------------|-------------|--------------------|--------------|
|                                 | %                    | OR                | (95% CI)    | AO<br>R            | (95% CI)     |
| Gender                          |                      |                   |             |                    |              |
| Female                          | 77                   |                   | Ref         |                    | Ref          |
| Male                            | 78                   | 1.06              | (0.71–1.58) | 1.12               | (0.70–1.78)  |
| Age                             |                      |                   |             |                    |              |
| 18–29                           | 72                   | Ref               |             | Ref                |              |
| 30–39                           | 81                   | 1.62 <sub>1</sub> | (1.02–2.56) | 1.46               | (0.86–2.48)  |
| 40–49                           | 80                   | 1.49              | (0.79–2.82) | 1.05               | (0.50–2.18)  |
| >50                             | 73                   | 1.04              | (0.53–2.03) | 0.85               | (0.38–1.93)  |
| Education                       |                      |                   |             |                    |              |
| Less than high school           | 88                   | Ref               |             | Ref                |              |
| High school graduate            | 78                   | 0.51              | (0.14–1.82) | 0.29               | (0.07–1.13)  |
| Some college                    | 76                   | 0.44              | (0.12–1.61) | 0.21 <sub>1</sub>  | (0.05–0.86)  |
| College degree or higher        | 76                   | 0.45              | (0.13–1.57) | 0.14 <sup>2</sup>  | (0.03–0.56)  |
| Household income                |                      |                   |             |                    |              |
| Less than 8000 MXN monthly      | 68                   | Ref               |             | Ref                |              |
| 8001 to 15,000 MXN monthly      | 73                   | 1.28              | (0.74–2.22) | 1.04               | (0.5–1.96)   |
| 15,001 to 20,000 MXN monthly    | 85                   | 2.6 <sup>2</sup>  | (1.39–5.08) | 2.7 <sup>2</sup>   | (1.29–5.86)  |
| >20,000 MXN monthly             | 82                   | 2.1 <sup>2</sup>  | (1.24–3.66) | 2.2 <sup>1</sup>   | (1.12–4.64)  |
| Don't know                      | 75                   | 1.44              | (0.28–7.49) | 2.67               | (0.46–15.36) |
| Data collection                 |                      |                   |             |                    |              |
| Wave 1                          | 74                   | Ref               |             | Ref                |              |
| Wave 2                          | 81                   | 1.48              | (0.92–2.40) | 1.51               | (0.89–2.57)  |
| Wave 3                          | 80                   | 1.48              | (0.80–2.49) | 1.19               | (0.67–2.14)  |
| Tobacco product use             |                      |                   |             |                    |              |
| Exclusive conventional smoker   | 71                   | Ref               |             | Ref                |              |
| Dual sporadic user              | 76                   | 1.27              | (0.82–1.98) | 1.43               | (0.81–2.51)  |
| Dual frequent user              | 88                   | 3.0 <sup>3</sup>  | (1.69–5.49) | 3.0 <sup>2</sup>   | (1.53–6.20)  |
| Cigarette consumption           |                      |                   |             |                    |              |
| Non-daily                       | 75                   | Ref               |             | Ref                |              |
| Daily ≤5 cigarettes             | 77                   | 1.11              | (0.67–1.85) | 0.76               | (0.42–1.35)  |
| Daily >5 cigarettes             | 81                   | 1.40              | (0.87–2.26) | 0.98               | (0.56–1.71)  |
| Flavor capsule use              |                      |                   |             |                    |              |
| No                              | 75                   | Ref               |             | Ref                |              |
| Yes                             | 78                   | 1.20              | (0.79–1.83) | 1.27               | (0.76–2.10)  |
| Recent quit attempt             |                      |                   |             |                    |              |
| No                              | 74                   | Ref               |             | Ref                |              |
| Yes                             | 80                   | 1.43              | (0.96–2.14) | 1.67 <sup>1</sup>  | (1.01–2.73)  |
| Plan to quit                    |                      |                   |             |                    |              |
| Sometime in the future          | 79                   | Ref               |             | Ref                |              |
| In the next six months          | 75                   | 0.78              | (0.53–1.17) | 0.72               | (0.44–1.18)  |
| E-cigarette ads on Internet     |                      |                   |             |                    |              |
| No                              | 68                   | Ref               |             | Ref                |              |
| Yes                             | 81                   | 1.9 <sup>2</sup>  | (1.29–2.97) | 2.0 <sup>2</sup>   | (1.25–3.28)  |
| E-cigarette ads by email        |                      |                   |             |                    |              |
| No                              | 78                   | Ref               |             | Ref                |              |
| Yes                             | 75                   | 0.83              | (0.55–1.24) | 0.74               | (0.45–1.24)  |
| Binge drinking                  |                      |                   |             |                    |              |
| No                              | 74                   | Ref               |             | Ref                |              |
| Yes                             | 83                   | 1.7 <sup>1</sup>  | (1.07–2.72) | 1.44               | (0.85–2.44)  |
| Marijuana use in the last month |                      |                   |             |                    |              |
| None                            | 81                   | Ref               |             | Ref                |              |

|                          |    |                  |             |                   |             |
|--------------------------|----|------------------|-------------|-------------------|-------------|
| Once                     | 68 | 0.5 <sup>1</sup> | (0.31–0.88) | 0.55              | (0.29–1.03) |
| More than once           | 73 | 0.66             | (0.41–1.08) | 0.49 <sup>1</sup> | (0.27–0.88) |
| <hr/>                    |    |                  |             |                   |             |
| Friends smokes           |    |                  |             |                   |             |
| No                       | 69 | Ref              |             | Ref               |             |
| Yes                      | 78 | 1.58             | (0.81–3.08) | 1.27              | (0.58–2.80) |
| <hr/>                    |    |                  |             |                   |             |
| Friends use e–cigarettes |    |                  |             |                   |             |
| No                       | 73 | Ref              |             | Ref               |             |
| Yes                      | 79 | 1.42             | (0.95–2.14) | 1.52              | (0.85–2.72) |
| <hr/>                    |    |                  |             |                   |             |
| Family smokes            |    |                  |             |                   |             |
| No                       | 74 | Ref              |             | Ref               |             |
| Yes                      | 78 | 1.30             | (0.84–2.00) | 1.37              | (0.79–2.36) |
| <hr/>                    |    |                  |             |                   |             |
| Family uses e–cigarettes |    |                  |             |                   |             |
| No                       | 78 | Ref              |             | Ref               |             |
| Yes                      | 77 | 0.94             | (0.63–1.41) | 0.58              | (0.32–1.04) |

<sup>1</sup>p-value,  $p < 0.05$ ; <sup>2</sup>p-value,  $p < 0.01$ ; <sup>2</sup>p-value,  $p < 0.01$ ; and <sup>3</sup>p-value;  $p < 0.001$ .
